# Supplementary material
Source: Springer Nature journal article supplement (https://www.springermedizin.de/resource/supplementary/12889_2013_6737_MOESM6_ESM.pdf/9498866)
Supplement: MOESM6 [file 9498866]

# ENGAGEMENT OF SCHOOLS, CHILDREN AND FAMILIES (Building trusting and supportive relationships over time)

## Mediating Variables

## Mediating Behaviours

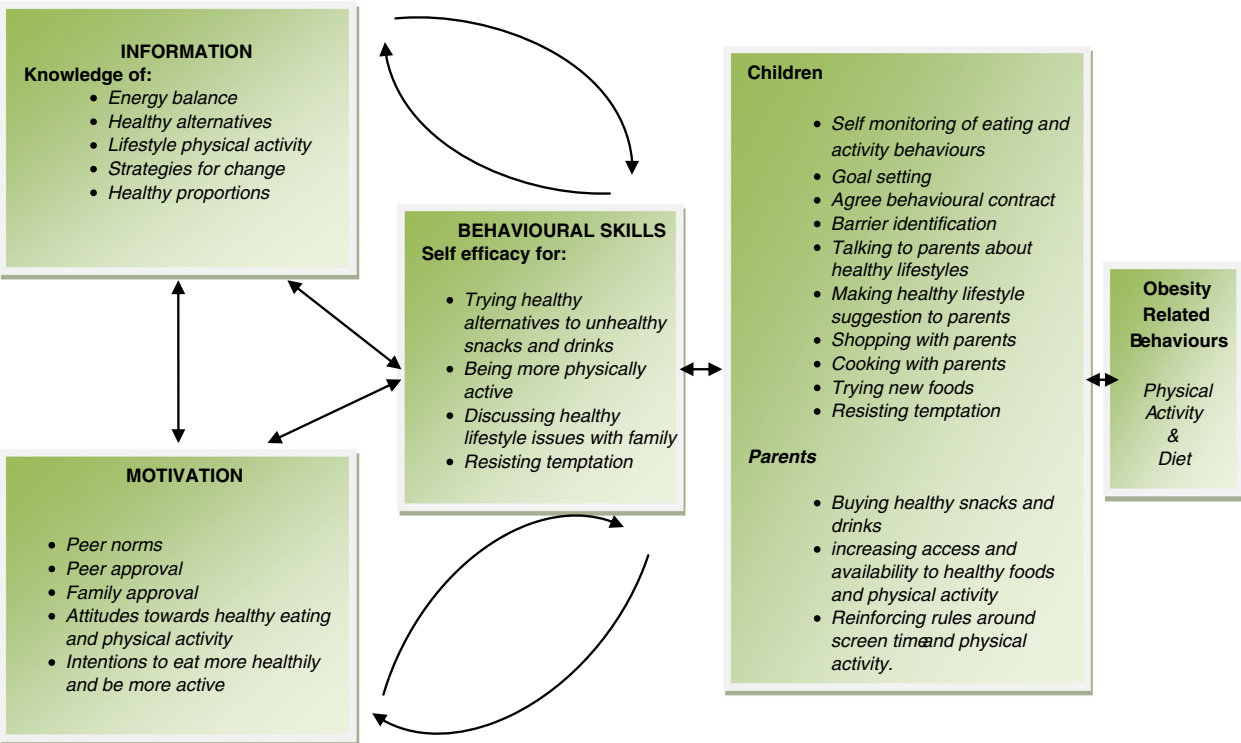

## THE HEALTHY LIFESTYLES PROGRAMME

(1 year intervention)
